# Supplementary material for: Classification and Characterization of Species within the Genus Lens Using Genotyping-by-Sequencing (GBS)
Source: PLoS One. 2015 Mar 27;10(3):e0122025. doi: 10.1371/journal.pone.0122025 (PMC4376907; doi:10.1371/journal.pone.0122025)
Supplement: S3 Table — (XLS) [file pone.0122025.s003.xls]

## Sheet: matrix
	1048-8R	1294m-23	3305-7	3339-3	3496-6	964a-46	CDC_Redberry	CDC_Robin	Eston	IG110809	IG_110810	IG_110813	IG_72525	IG72537	IG72552	IG_72555	IG_72611	IG_72613	IG_72623	IG_72633	IG_72639	IG_72643	IG_72713	IG_72815	IG_72847	ILL1704	ILL7537	L01-827a	PI_32087	PI_320937	PI_572376	PI_572390
1048-8R	0	0.0746723	0.0592743	0.0857933	0.064191	0.0569794	0.0694363	0.0547382	0.0537204	0.262531	0.224348	0.190469	0.129134	0.23909	0.232568	0.410257	0.129106	0.153233	0.237852	0.404099	0.191689	0.127143	0.428412	0.249828	0.268332	0.128557	0.0558071	0.256379	0.0741486	0.0557598	0.116123	0.154803
1294m-23	0.0746723	0	0.0633873	0.0867685	0.0711139	0.0645038	0.0742257	0.0701964	0.0684176	0.266267	0.227389	0.192711	0.133238	0.240513	0.234078	0.412002	0.134141	0.156129	0.24087	0.404651	0.195683	0.131052	0.432519	0.254068	0.271625	0.128544	0.0668776	0.26026	0.0814293	0.0615087	0.122037	0.158287
3305-7	0.0592743	0.0633873	0	0.0657762	0.0446167	0.0532603	0.049834	0.0543481	0.0464849	0.252163	0.225216	0.188729	0.115821	0.237268	0.231494	0.409882	0.113078	0.143525	0.230823	0.404403	0.18199	0.113937	0.422559	0.248855	0.260796	0.115201	0.0458184	0.249104	0.0683071	0.0462262	0.101569	0.148164
3339-3	0.0857933	0.0867685	0.0657762	0	0.0864976	0.0559919	0.0893845	0.0801816	0.0789206	0.275506	0.229444	0.195033	0.150621	0.247565	0.240652	0.413051	0.14044	0.157133	0.244157	0.403689	0.197838	0.133897	0.438815	0.256367	0.278274	0.143198	0.0640204	0.259603	0.103321	0.0662801	0.139361	0.15831
3496-6	0.064191	0.0711139	0.0446167	0.0864976	0	0.0588158	0.0622878	0.0571957	0.0524859	0.254667	0.215278	0.182611	0.121973	0.235069	0.22592	0.413013	0.118302	0.145304	0.233591	0.404899	0.184358	0.117212	0.425005	0.248553	0.263688	0.119507	0.0541603	0.251039	0.077984	0.0534518	0.110971	0.149834
964a-46	0.0569794	0.0645038	0.0532603	0.0559919	0.0588158	0	0.0589218	0.0573516	0.0527631	0.250377	0.215999	0.181957	0.121456	0.235999	0.226727	0.414972	0.119642	0.14459	0.232591	0.409736	0.1806	0.116483	0.424466	0.250909	0.263746	0.1202	0.052913	0.253363	0.0731648	0.0549048	0.10928	0.148414
CDC_Redberry	0.0694363	0.0742257	0.049834	0.0893845	0.0622878	0.0589218	0	0.0617056	0.057753	0.251845	0.212305	0.174281	0.12239	0.231128	0.223593	0.4051	0.116496	0.140176	0.233866	0.396363	0.176825	0.11874	0.42009	0.246307	0.25993	0.109916	0.0387959	0.249317	0.082942	0.0490118	0.110885	0.143807
CDC_Robin	0.0547382	0.0701964	0.0543481	0.0801816	0.0571957	0.0573516	0.0617056	0	0.0405829	0.247303	0.216001	0.182096	0.120345	0.235499	0.226969	0.421926	0.114697	0.143679	0.23167	0.415212	0.180942	0.114086	0.425296	0.250782	0.258863	0.120231	0.0556278	0.250981	0.0615291	0.0485113	0.105342	0.147551
Eston	0.0537204	0.0684176	0.0464849	0.0789206	0.0524859	0.0527631	0.057753	0.0405829	0	0.245427	0.213184	0.179002	0.121529	0.237588	0.224716	0.419652	0.115768	0.142302	0.23174	0.413605	0.178543	0.113107	0.424568	0.252582	0.262878	0.123691	0.0499342	0.253722	0.0675925	0.0473653	0.105563	0.147014
IG110809	0.262531	0.266267	0.252163	0.275506	0.254667	0.250377	0.251845	0.247303	0.245427	0	0.0978317	0.121531	0.258383	0.102049	0.109206	0.445053	0.260741	0.260993	0.239305	0.435185	0.235449	0.257595	0.464376	0.282771	0.305147	0.263843	0.243452	0.281484	0.274254	0.250654	0.257884	0.259275
IG_110810	0.224348	0.227389	0.225216	0.229444	0.215278	0.215999	0.212305	0.216001	0.213184	0.0978317	0	0.0868287	0.226671	0.0794481	0.0781829	0.434055	0.226637	0.233197	0.223536	0.426951	0.212274	0.226095	0.4449	0.265016	0.280919	0.230649	0.21865	0.266605	0.228621	0.218661	0.22794	0.230433
IG_110813	0.190469	0.192711	0.188729	0.195033	0.182611	0.181957	0.174281	0.182096	0.179002	0.121531	0.0868287	0	0.19852	0.107874	0.0983154	0.429565	0.200952	0.211251	0.221038	0.426606	0.197026	0.200272	0.438552	0.259705	0.271738	0.205874	0.181941	0.261717	0.19687	0.184341	0.199637	0.211769
IG_72525	0.129134	0.133238	0.115821	0.150621	0.121973	0.121456	0.12239	0.120345	0.121529	0.258383	0.226671	0.19852	0	0.240633	0.236136	0.416369	0.122825	0.153771	0.23643	0.408795	0.20139	0.114056	0.430706	0.254029	0.268634	0.136597	0.114258	0.255645	0.136218	0.11486	0.130892	0.156265
IG72537	0.23909	0.240513	0.237268	0.247565	0.235069	0.235999	0.231128	0.235499	0.237588	0.102049	0.0794481	0.107874	0.240633	0	0.0835652	0.434412	0.242577	0.248082	0.224574	0.425903	0.226513	0.242866	0.450505	0.268398	0.286578	0.246968	0.233957	0.271104	0.243839	0.236151	0.244304	0.246267
IG72552	0.232568	0.234078	0.231494	0.240652	0.22592	0.226727	0.223593	0.226969	0.224716	0.109206	0.0781829	0.0983154	0.236136	0.0835652	0	0.436338	0.236668	0.240582	0.225913	0.426297	0.219752	0.239015	0.448936	0.266576	0.286499	0.239908	0.226041	0.268129	0.239531	0.228748	0.236839	0.240128
IG_72555	0.410257	0.412002	0.409882	0.413051	0.413013	0.414972	0.4051	0.421926	0.419652	0.445053	0.434055	0.429565	0.416369	0.434412	0.436338	0	0.420713	0.425969	0.43908	0.164136	0.428832	0.42109	0.205852	0.425409	0.434175	0.418443	0.411088	0.426564	0.413993	0.416335	0.421417	0.426418
IG_72611	0.129106	0.134141	0.113078	0.14044	0.118302	0.119642	0.116496	0.114697	0.115768	0.260741	0.226637	0.200952	0.122825	0.242577	0.236668	0.420713	0	0.147918	0.236963	0.412172	0.203495	0.116087	0.431921	0.250902	0.269605	0.138221	0.112298	0.25685	0.136187	0.112238	0.133369	0.151049
IG_72613	0.153233	0.156129	0.143525	0.157133	0.145304	0.14459	0.140176	0.143679	0.142302	0.260993	0.233197	0.211251	0.153771	0.248082	0.240582	0.425969	0.147918	0	0.240894	0.41728	0.207046	0.154124	0.435062	0.255711	0.270828	0.160742	0.144879	0.25906	0.159998	0.144147	0.157611	0.0403714
IG_72623	0.237852	0.24087	0.230823	0.244157	0.233591	0.232591	0.233866	0.23167	0.23174	0.239305	0.223536	0.221038	0.23643	0.224574	0.225913	0.43908	0.236963	0.240894	0	0.432789	0.14784	0.238508	0.450799	0.266053	0.288157	0.246115	0.22701	0.275363	0.243902	0.230304	0.239274	0.240105
IG_72633	0.404099	0.404651	0.404403	0.403689	0.404899	0.409736	0.396363	0.415212	0.413605	0.435185	0.426951	0.426606	0.408795	0.425903	0.426297	0.164136	0.412172	0.41728	0.432789	0	0.422082	0.417182	0.161688	0.41512	0.426878	0.410336	0.409961	0.419527	0.405759	0.411385	0.411123	0.420536
IG_72639	0.191689	0.195683	0.18199	0.197838	0.184358	0.1806	0.176825	0.180942	0.178543	0.235449	0.212274	0.197026	0.20139	0.226513	0.219752	0.428832	0.203495	0.207046	0.14784	0.422082	0	0.198323	0.43398	0.256236	0.274026	0.205118	0.178712	0.262568	0.201296	0.181625	0.199676	0.208794
IG_72643	0.127143	0.131052	0.113937	0.133897	0.117212	0.116483	0.11874	0.114086	0.113107	0.257595	0.226095	0.200272	0.114056	0.242866	0.239015	0.42109	0.116087	0.154124	0.238508	0.417182	0.198323	0	0.433146	0.255745	0.269098	0.133617	0.109652	0.255464	0.132515	0.112289	0.124116	0.154857
IG_72713	0.428412	0.432519	0.422559	0.438815	0.425005	0.424466	0.42009	0.425296	0.424568	0.464376	0.4449	0.438552	0.430706	0.450505	0.448936	0.205852	0.431921	0.435062	0.450799	0.161688	0.43398	0.433146	0	0.434105	0.453254	0.433503	0.417222	0.435526	0.438582	0.424745	0.430314	0.437291
IG_72815	0.249828	0.254068	0.248855	0.256367	0.248553	0.250909	0.246307	0.250782	0.252582	0.282771	0.265016	0.259705	0.254029	0.268398	0.266576	0.425409	0.250902	0.255711	0.266053	0.41512	0.256236	0.255745	0.434105	0	0.199101	0.258977	0.249414	0.173405	0.255468	0.248862	0.259131	0.256712
IG_72847	0.268332	0.271625	0.260796	0.278274	0.263688	0.263746	0.25993	0.258863	0.262878	0.305147	0.280919	0.271738	0.268634	0.286578	0.286499	0.434175	0.269605	0.270828	0.288157	0.426878	0.274026	0.269098	0.453254	0.199101	0	0.273946	0.258874	0.0749017	0.277115	0.260762	0.271384	0.272349
ILL1704	0.128557	0.128544	0.115201	0.143198	0.119507	0.1202	0.109916	0.120231	0.123691	0.263843	0.230649	0.205874	0.136597	0.246968	0.239908	0.418443	0.138221	0.160742	0.246115	0.410336	0.205118	0.133617	0.433503	0.258977	0.273946	0	0.105187	0.26067	0.134433	0.114957	0.141796	0.161753
ILL7537	0.0558071	0.0668776	0.0458184	0.0640204	0.0541603	0.052913	0.0387959	0.0556278	0.0499342	0.243452	0.21865	0.181941	0.114258	0.233957	0.226041	0.411088	0.112298	0.144879	0.22701	0.409961	0.178712	0.109652	0.417222	0.249414	0.258874	0.105187	0	0.248346	0.0658247	0.0442096	0.100369	0.146275
L01-827a	0.256379	0.26026	0.249104	0.259603	0.251039	0.253363	0.249317	0.250981	0.253722	0.281484	0.266605	0.261717	0.255645	0.271104	0.268129	0.426564	0.25685	0.25906	0.275363	0.419527	0.262568	0.255464	0.435526	0.173405	0.0749017	0.26067	0.248346	0	0.261651	0.249131	0.262088	0.260858
Lc8602303T	0.0744192	0.0817622	0.0603498	0.08617	0.0701695	0.0703919	0.0691273	0.0658344	0.0643408	0.249898	0.223896	0.192296	0.119092	0.239972	0.233185	0.416336	0.11387	0.144952	0.230126	0.409514	0.184423	0.114552	0.419729	0.249402	0.259543	0.11967	0.0623447	0.250198	0.077852	0.0572574	0.105194	0.149276
PI_32087	0.0741486	0.0814293	0.0683071	0.103321	0.077984	0.0731648	0.082942	0.0615291	0.0675925	0.274254	0.228621	0.19687	0.136218	0.243839	0.239531	0.413993	0.136187	0.159998	0.243902	0.405759	0.201296	0.132515	0.438582	0.255468	0.277115	0.134433	0.0658247	0.261651	0	0.0418516	0.122287	0.161817
PI_320937	0.0557598	0.0615087	0.0462262	0.0662801	0.0534518	0.0549048	0.0490118	0.0485113	0.0473653	0.250654	0.218661	0.184341	0.11486	0.236151	0.228748	0.416335	0.112238	0.144147	0.230304	0.411385	0.181625	0.112289	0.424745	0.248862	0.260762	0.114957	0.0442096	0.249131	0.0418516	0	0.0986761	0.148064
PI_572376	0.116123	0.122037	0.101569	0.139361	0.110971	0.10928	0.110885	0.105342	0.105563	0.257884	0.22794	0.199637	0.130892	0.244304	0.236839	0.421417	0.133369	0.157611	0.239274	0.411123	0.199676	0.124116	0.430314	0.259131	0.271384	0.141796	0.100369	0.262088	0.122287	0.0986761	0	0.15918
PI_572390	0.154803	0.158287	0.148164	0.15831	0.149834	0.148414	0.143807	0.147551	0.147014	0.259275	0.230433	0.211769	0.156265	0.246267	0.240128	0.426418	0.151049	0.0403714	0.240105	0.420536	0.208794	0.154857	0.437291	0.256712	0.272349	0.161753	0.146275	0.260858	0.161817	0.148064	0.15918	0
VIR_421	0.0674256	0.0729809	0.0548656	0.0952749	0.0619063	0.0630718	0.068454	0.0545632	0.0550922	0.254258	0.216838	0.182982	0.127225	0.235439	0.227872	0.412196	0.122848	0.146739	0.233766	0.40815	0.186659	0.119565	0.426564	0.249874	0.263419	0.128737	0.0587781	0.251264	0.0696773	0.0490612	0.1106	0.150602

## Sheet: Newick
Figure 1a
((1294m-23_r1:0.03021,(3339-3_br1:0.02185,964a-46_r1:0.01382):0.01083):0.00327,((((3305-7_ar1:0.01979,3496-6_ar1:0.02424):0.00469,((CDC_Redberry_r1:0.02201,ILL7537_r1:0.01823):0.00775,(((((((((((IG__110809_r1:0.02771,IG__72537_ar1:0.01968):0.01099,IG__72552_ar1:0.02181):0.01338,IG_110810_r1:0.02380):0.03979,IG_110813_r1:0.02392):0.08323,(IG_72623_r1:0.05417,IG_72639_br1:0.03492):0.04620):0.00362,…
Figure 1b
(((((((IG_72847_ar1:3e-05,(L01-827_ar1:0.00014,((((((IG_72537_ar1:0.00022,(IG_110809_ar1:6e-05,(IG_110809_br2:6e-05,(IG_110813_ar2:0.00057,(IG_72537_br2:0.00092,IG_72552_br2:0.00093)59:6e-05)94:0.00058)100:0.01773)98:0.00066)85:0.00049,IG_72552_ar1:0.00075)100:0.06085,(((IG_116008_r2:0.02087,(IG_72639_ar2:0.02331,((IG_72639_br1:0.04887,IG_72760_r2:0.00114)100:0.00625,((IG_72534_r2*:0.00124,IG_725…
